# Supplementary material for: Macroscopic Particle Transport in Dissipative Long-Range Bosonic Systems
Source: Research Square preprint supplement (doi:10.21203/rs.3.rs-6660091/v1), 2025-05-28
Supplement: Supplementary file 1 [file cada146c6eb9a0f15f3874d5.pdf]

# Supplemental Information for “Macroscopic particle transport in dissipative long-range bosonic systems”

Hongchao Li,<sup>1,\*</sup> Cheng Shang,<sup>2,†</sup> Tomotaka Kuwahara,<sup>2,3,4,‡</sup> and Tan Van Vu<sup>5,§</sup>

<sup>1</sup>*Department of Physics, University of Tokyo, 7-3-1 Hongo, Tokyo 113-0033, Japan*

<sup>2</sup>*Analytical quantum complexity RIKEN Hakubi Research Team,*

*RIKEN Center for Quantum Computing (RQC), Wako, Saitama 351-0198, Japan*

<sup>3</sup>*PRESTO, Japan Science and Technology (JST), Kawaguchi, Saitama 332-0012, Japan*

<sup>4</sup>*RIKEN Cluster for Pioneering Research (CPR), Wako, Saitama 351-0198, Japan*

<sup>5</sup>*Center for Gravitational Physics and Quantum Information,  
Yukawa Institute for Theoretical Physics, Kyoto University,  
Kitashirakawa Oiwakecho, Sakyo-ku, Kyoto 606-8502, Japan*

## CONTENTS

|                                                                    |   |
|--------------------------------------------------------------------|---|
| I. Macroscopic particle transport theory in closed quantum systems | 1 |
| II. Triangle inequality of the generalized Wasserstein distance    | 3 |

### I. MACROSCOPIC PARTICLE TRANSPORT THEORY IN CLOSED QUANTUM SYSTEMS

In this section, we review the macroscopic particle transport theory in long-range closed quantum systems. Firstly, we show the proof of  $\tau \geq \kappa_1^\varepsilon d_{XY}^{\alpha_\varepsilon}$ . Since the density matrix follows the von Neumann equation, the dynamics of the boson number density  $x_i(t) := \text{tr}(n_i \rho_t)/N$  is given by

$$\dot{x}_i = \frac{1}{N} \sum_{j,j \neq i} 2J_{ij}(t) \text{Im}[\text{tr}(b_j^\dagger b_i \rho_t)] =: \sum_{j(\neq i)} \phi_{ij}(t), \quad (\text{S1})$$

where  $\phi_{ij}(t)$  is the current flowing from the site  $j$  to the site  $i$  satisfying  $\phi_{ij} = -\phi_{ji}$ . On the one hand, since a fraction  $\mu$  of bosons should be transported from  $X$  to  $Y$  in the time period  $\tau$ , we have the relation

$$x_Y(\tau) - x_{X^c}(0) \geq \mu. \quad (\text{S2})$$

Here,  $X^c := \Lambda \setminus X$  is the complement of  $X$ . Since we consider the Wasserstein distance between the final distribution  $\mathbf{x}(\tau)$  and the initial distribution  $\mathbf{x}(0)$ , the coupling  $\pi_{mn}$  should satisfy  $\sum_m \pi_{mn} = x_n(0)$  and  $\sum_n \pi_{mn} = x_m(\tau)$ . Accordingly, we obtain

$$x_Y(\tau) - x_{X^c}(0) = \sum_{i \in Y, j \in \Lambda} \pi_{ij} - \sum_{i \in \Lambda, j \in X^c} \pi_{ij} = \sum_{i \in Y, j \in X} \pi_{ij} - \sum_{i \in Y^c, j \in X^c} \pi_{ij} \leq \sum_{i \in Y, j \in X} \pi_{ij}. \quad (\text{S3})$$

Hence, the Wasserstein distance can be lower bounded by

$$W(\mathbf{x}_0, \mathbf{x}_\tau) \geq \min_{i \in Y, j \in X} c_{ij} \sum_{i \in Y, j \in X} \pi_{ij} \geq \mu d_{XY}^{\alpha_\varepsilon}. \quad (\text{S4})$$

On the other hand, since the current can be upper bounded by

$$|\phi_{ij}| \leq |J_{ij}(t)|(x_i + x_j). \quad (\text{S5})$$

---

\* [lhc@cat.phys.s.u-tokyo.ac.jp](mailto:lhc@cat.phys.s.u-tokyo.ac.jp)

† [cheng.shang@riken.jp](mailto:cheng.shang@riken.jp)

‡ [tomotaka.kuwahara@riken.jp](mailto:tomotaka.kuwahara@riken.jp)

§ [tan.vu@yukawa.kyoto-u.ac.jp](mailto:tan.vu@yukawa.kyoto-u.ac.jp)

With the Kantorovich-Rubinstein duality, we obtain

$$\begin{aligned} W(\mathbf{x}_0, \mathbf{x}_\tau) &\leq \max_{\|h\|_L \leq 1} h^T(\mathbf{x}(\tau) - \mathbf{x}(0)) = \max_{\|h\|_L \leq 1} \sum_i h_i \int_0^\tau dt \sum_{j \neq i} \phi_{ij}(t) \\ &\leq \frac{1}{2} \max_{\|h\|_L \leq 1} \int_0^\tau dt \sum_{j \neq i} |\phi_{ij}| |h_i - h_j| \leq \frac{1}{2} \int_0^\tau dt \sum_{j \neq i} c_{ij} |\phi_{ij}(t)|. \end{aligned} \quad (\text{S6})$$

Here, we use  $\|h\|_L \leq 1$  to represent  $|h_i - h_j| \leq c_{ij}$ . Therefore, the upper bound of the Wasserstein distance can be shown as

$$\begin{aligned} W(\mathbf{x}_0, \mathbf{x}_\tau) &\leq \frac{1}{2} \int_0^\tau dt \sum_{j \neq i} c_{ij} |\phi_{ij}(t)| \leq \sum_{i \neq j} J_{ij} c_{ij} \int_0^\tau x_i(t) dt = \int_0^\tau dt \sum_i x_i(t) \sum_{l=1}^\infty \sum_{j \in (i[l+1] \setminus i[l])} \frac{J}{\|i - j\|^{\alpha - \alpha_\varepsilon}} \\ &\leq \int_0^\tau dt \sum_i x_i(t) \sum_{l=1}^\infty \frac{J}{l^{\alpha - \alpha_\varepsilon - D + 1}} = J\varphi\zeta(\alpha - \alpha_\varepsilon - D + 1)\tau. \end{aligned} \quad (\text{S7})$$

Hence,

$$\tau \geq \frac{\mu}{J\varphi\zeta(\alpha - \alpha_\varepsilon - D + 1)} d_{XY}^{\alpha_\varepsilon} =: \kappa_1^\varepsilon d_{XY}^{\alpha_\varepsilon}, \quad (\text{S8})$$

which is nothing but Eq. (5). Then, we move to prove the inequality  $\langle P_{n_Y \geq N_0 + \Delta N_0} \rangle_{\rho_\tau} \leq \wp$ , where

$$\wp = (\Delta N_0 d_{XY}^{\alpha_\varepsilon})^{-1} N J \varphi \zeta(\alpha - \alpha_\varepsilon - D + 1) \tau. \quad (\text{S9})$$

By defining the probability distribution  $p_{\vec{N}}(t) := \text{tr}(\Pi_{\vec{N}} \rho_t)$ , where  $\Pi_{\vec{N}} = |\vec{N}\rangle\langle\vec{N}|$  be the projection onto the state  $|\vec{N}\rangle$ , the time evolution for  $p_{\vec{N}}(t)$  can be derived from the von Neumann equation as

$$\begin{aligned} \dot{p}_{\vec{N}}(t) &= -i \text{tr}(\Pi_{\vec{N}} [H_t, \rho_t]) = i \sum_{i \neq j} \langle \vec{N} | [ \rho_t, J_{ij}(t) b_i^\dagger b_j ] | \vec{N} \rangle = i \sum_{i \neq j} J_{ij}(t) \sqrt{n_i n_{j'}} (\langle \vec{N} | \rho_t | \vec{N}' \rangle - \langle \vec{N}' | \rho_t | \vec{N} \rangle) \\ &=: \sum_{i \neq j} \varphi_{\vec{N}\vec{N}'}(t), \end{aligned} \quad (\text{S10})$$

where  $\varphi_{\vec{N}\vec{N}'}(t)$  represents all possible flows from state  $|\vec{N}\rangle$  to state  $|\vec{N}'\rangle$ , which satisfies  $n'_i = n_i - 1$ ,  $n'_j = n_j + 1$  and  $n'_k = n_k$  for all  $k \neq i, j$ . For the neighboring states  $|\vec{N}\rangle$  and  $|\vec{N}'\rangle$ , the transport cost is defined as  $c_{\vec{N}\vec{N}'} = \|i - j\|^{\alpha_\varepsilon}$ . Following that, the cost between arbitrary two states  $|\vec{N}\rangle$  and  $|\vec{M}\rangle$  can be defined as the shortest-path cost over all possible paths connecting these states,  $c_{\vec{M}\vec{N}} = \min \sum_{k=1}^K c_{\vec{N}_k, \vec{N}_{k-1}}$ , where  $c_{\vec{N}_0} = c_{\vec{N}}$ ,  $c_{\vec{N}_K} = c_{\vec{M}}$ , and  $|\vec{N}_{k-1}\rangle$  and  $|\vec{N}_k\rangle$  are neighboring states for all  $1 \leq k \leq K$ . The Wasserstein distance reads:

$$W(\mathbf{p}_0, \mathbf{p}_\tau) = \min_{\pi \in \mathcal{C}(\mathbf{p}_0, \mathbf{p}_\tau)} \sum_{\vec{M}, \vec{N}} c_{\vec{M}\vec{N}} \pi_{\vec{M}\vec{N}}, \quad (\text{S11})$$

where  $\mathbf{p}_\tau$  and  $\mathbf{p}_0$  represent the final and initial probability distributions, respectively. Similar to the previous analysis, we obtain

$$W(\mathbf{p}_0, \mathbf{p}_\tau) \leq \frac{1}{2} \int_0^\tau dt \sum_{\vec{N}} \sum_{i \neq j} c_{\vec{N}\vec{N}'} |\varphi_{\vec{N}\vec{N}'}(t)|. \quad (\text{S12})$$

By combining Eq. (S12) with the definition for  $\varphi_{\vec{N}\vec{N}'}$  in Eq. (S10), the right-hand side of Eq. (S12) can be upper bounded as

$$\frac{1}{2} \int_0^\tau \sum_{\vec{N}} \sum_{i \neq j} c_{\vec{N}\vec{N}'} |\varphi_{\vec{N}\vec{N}'}| dt \leq \sum_{\vec{N}} \int_0^\tau dt p_{\vec{N}}(t) \sum_i n_i \sum_{j \neq i} \frac{J}{\|i - j\|^{\alpha - \alpha_\varepsilon}} \leq N \tau J \varphi \zeta(\alpha - \alpha_\varepsilon - D + 1), \quad (\text{S13})$$

where we apply the Cauchy-Schwarz inequality in the first inequality as

$$|\varphi_{\vec{N}\vec{N}'}(t)| \leq |J_{ij}|[n_i p_{\vec{N}}(t) + n'_j p_{\vec{N}'}(t)]. \quad (\text{S14})$$

Next, we make the following definitions:

$$S_0 := \{\vec{N} | \sum_{i \in X^c} n_i \leq N_0\}, \quad S_\tau := \{\vec{N} | \sum_{i \in Y} n_i \geq N_0 + \Delta N_0\}. \quad (\text{S15})$$

The process  $\vec{N} \in S_0 \rightarrow \vec{M} \in S_\tau$  signifies that at least  $\Delta N_0$  particles are transported from region  $X$  to the region  $Y$ . To determine the lower bound of the Wasserstein distance, we first give the lower bound of  $c_{\vec{M}\vec{N}}$  as

$$c_{\vec{M}\vec{N}} \geq \Delta N_0 \sum_{l=1}^L c_{\vec{N}_l, \vec{N}_{l-1}} \geq \Delta N_0 \sum_{l=1}^L \|\vec{i}_l - \vec{i}_{l-1}\|^{\alpha_\varepsilon} \geq \Delta N_0 d_{XY}^{\alpha_\varepsilon} \quad (\text{S16})$$

with  $\vec{N}_0 \rightarrow \dots \rightarrow \vec{N}_L$  be a sequence of states that transfers one particle from  $X$  to  $Y$ . Following this, we obtain

$$W(\mathbf{p}_0, \mathbf{p}_\tau) = \min_{\pi} \sum_{\vec{M}, \vec{N}} c_{\vec{M}\vec{N}} \pi_{\vec{M}\vec{N}} \geq \Delta N_0 d_{XY}^{\alpha_\varepsilon} \min_{\pi} \sum_{\vec{M} \in S_\tau, \vec{N} \in S_0} \pi_{\vec{M}\vec{N}}, \quad (\text{S17})$$

and  $\sum_{\vec{N} \in S_0} \pi_{\vec{M}\vec{N}} = p_{\vec{M}}(\tau)$  since  $p_{\vec{N}}(0) = 0$  for  $\vec{N} \notin S_0$ . Using these facts, we obtain a lower bound for the Wasserstein distance:

$$W(\mathbf{p}_0, \mathbf{p}_\tau) \geq \Delta N_0 d_{XY}^{\alpha_\varepsilon} \sum_{\vec{M} \in S_\tau} p_{\vec{M}}(\tau) = \Delta N_0 d_{XY}^{\alpha_\varepsilon} \langle P_{n_Y \geq N_0 + \Delta N_0} \rangle_{\rho_\tau}, \quad (\text{S18})$$

where  $P_{n_Y \geq N_0 + \Delta N_0}$  is a projection operator given by

$$P_{n_Y \geq N_0 + \Delta N_0} := \sum_{\vec{N}: \langle \vec{N} | n_Y | \vec{N} \rangle \geq N_0 + \Delta N_0} |\vec{N}\rangle \langle \vec{N}|, \quad (\text{S19})$$

and  $\langle P_{n_Y \geq N_0 + \Delta N_0} \rangle_{\rho_\tau} := \text{Tr}[P_{n_Y \geq N_0 + \Delta N_0} \rho_\tau]$  is the expectation value of the projection operator, which is nothing but the probability of finding  $N_0 + \Delta N_0$  bosons in the region  $Y$  at time  $\tau$ . Combining with Eq. (S13) and Eq. (S18) yields

$$\langle P_{n_Y \geq N_0 + \Delta N_0} \rangle_{\rho_\tau} \leq \frac{NJ\varphi\zeta(\alpha - \alpha_\varepsilon - D + 1)\tau}{\Delta N_0 d_{XY}^{\alpha_\varepsilon}}, \quad (\text{S20})$$

which is the same as Eq. (17).

## II. TRIANGLE INEQUALITY OF THE GENERALIZED WASSERSTEIN DISTANCE

In this section, we aim to prove that the generalized Wasserstein distance defined in Eq. (20) satisfies the triangle inequality:

$$\tilde{W}(\mathbf{x}, \mathbf{y}) + \tilde{W}(\mathbf{y}, \mathbf{z}) \geq \tilde{W}(\mathbf{x}, \mathbf{z}), \quad (\text{S21})$$

where  $\|\mathbf{x}\|_1 \geq \|\mathbf{y}\|_1 \geq \|\mathbf{z}\|_1$ .

*Proof.* We define  $\mathbf{x}^{(1)}$  and  $\mathbf{y}^{(1)}$  be the optimal vectors satisfying  $\|\mathbf{x}^{(1)}\|_1 = \|\mathbf{y}^{(1)}\|_1$  to attain the generalized Wasserstein distance  $\tilde{W}(\mathbf{x}, \mathbf{y})$ , i.e.,  $W(\mathbf{x}^{(1)}, \mathbf{y}^{(1)}) = \tilde{W}(\mathbf{x}, \mathbf{y})$  where  $W(\mathbf{x}^{(1)}, \mathbf{y}^{(1)})$  is defined as

$$W(\mathbf{x}^{(1)}, \mathbf{y}^{(1)}) := \min_{\pi} \sum_{m,n} \pi_{mn}^{(1)} c_{mn}. \quad (\text{S22})$$

Similarly, we can also define the vectors  $\mathbf{y}^{(2)}$  and  $\mathbf{z}^{(2)}$  to attain the generalized Wasserstein distance  $\tilde{W}(\mathbf{y}, \mathbf{z})$  with

$\|\mathbf{y}^{(2)}\|_1 = \|\mathbf{z}^{(2)}\|_1$ . Similarly, we also have

$$W(\mathbf{y}^{(2)}, \mathbf{z}^{(2)}) := \min_{\pi} \sum_{m,n} \pi_{mn}^{(2)} c_{mn}. \quad (\text{S23})$$

By defining  $\pi_{mkn} := \pi_{kn}^{(1)} \pi_{mk}^{(2)} / y_k^{(1)}$ , we can verify that

$$\sum_n \pi_{mkn} = \sum_n \frac{\pi_{kn}^{(1)} \pi_{mk}^{(2)}}{y_k^{(1)}} = \pi_{mk}^{(2)}, \quad \sum_m \pi_{mkn} = \pi_{kn}^{(1)} \frac{y_k^{(2)}}{y_k^{(1)}} \leq \pi_{kn}^{(1)}. \quad (\text{S24})$$

By applying these two relations, we obtain

$$\begin{aligned} \tilde{W}(\mathbf{x}, \mathbf{y}) + \tilde{W}(\mathbf{y}, \mathbf{z}) &= W(\mathbf{x}^{(1)}, \mathbf{y}^{(1)}) + W(\mathbf{y}^{(2)}, \mathbf{z}^{(2)}) \\ &= \sum_{k,n} \pi_{kn}^{(1)} c_{kn} + \sum_{m,k} \pi_{mk}^{(2)} c_{mk} \geq \sum_{m,n,k} \pi_{mkn} c_{mn} = \sum_{m,n} \tilde{\pi}_{mn} c_{mn}, \end{aligned} \quad (\text{S25})$$

where we apply the triangle inequality  $c_{mk} + c_{kn} \geq c_{mn}$  and define a new coupling  $\tilde{\pi}_{mn} := \sum_k \pi_{mkn}$ . The edge distributions of  $\tilde{\pi}_{mn}$  are given by

$$\sum_n \tilde{\pi}_{mn} = \sum_{n,k} \pi_{mkn} = \sum_k \pi_{mk}^{(2)} = z_m^{(2)}, \quad \sum_m \tilde{\pi}_{mn} = \sum_{m,k} \pi_{mkn} = \sum_k \pi_{kn}^{(1)} \frac{y_k^{(2)}}{y_k^{(1)}} =: \tilde{x}_n, \quad (\text{S26})$$

where we have  $\tilde{x}_n \leq x_n^{(1)} \leq x_n$ , indicating  $\mathbf{x} \succeq \tilde{\mathbf{x}}$ . Consequently, we derive the following inequality:

$$\tilde{W}(\mathbf{x}, \mathbf{y}) + \tilde{W}(\mathbf{y}, \mathbf{z}) \geq \sum_{mn} \tilde{\pi}_{mn} c_{mn} \geq W(\tilde{\mathbf{x}}, \mathbf{z}^{(2)}) \geq \tilde{W}(\mathbf{x}, \mathbf{z}), \quad (\text{S27})$$

which establishes the triangle inequality for the generalized Wasserstein distance and completes the proof.  $\square$
